# Supplementary material for: Climate Variability and Dengue Hemorrhagic Fever in Surabaya, East Java, Indonesia
Source: Preprints.org preprint supplement (doi:10.20944/preprints201812.0206.v1), 2018-12-17

**Supplementary Files**

**Attachment 1: Meteorological data in Surabaya for the year 2016 and 2017 (source: Indonesian Agency for Meteorology, Climatology and Geophysics)**

The climatic data used in this study are:

- **Suhu rata-rata: Average temperature**
- **Kelembaban: Humidity**
- **Curah hujan: Rainfall**


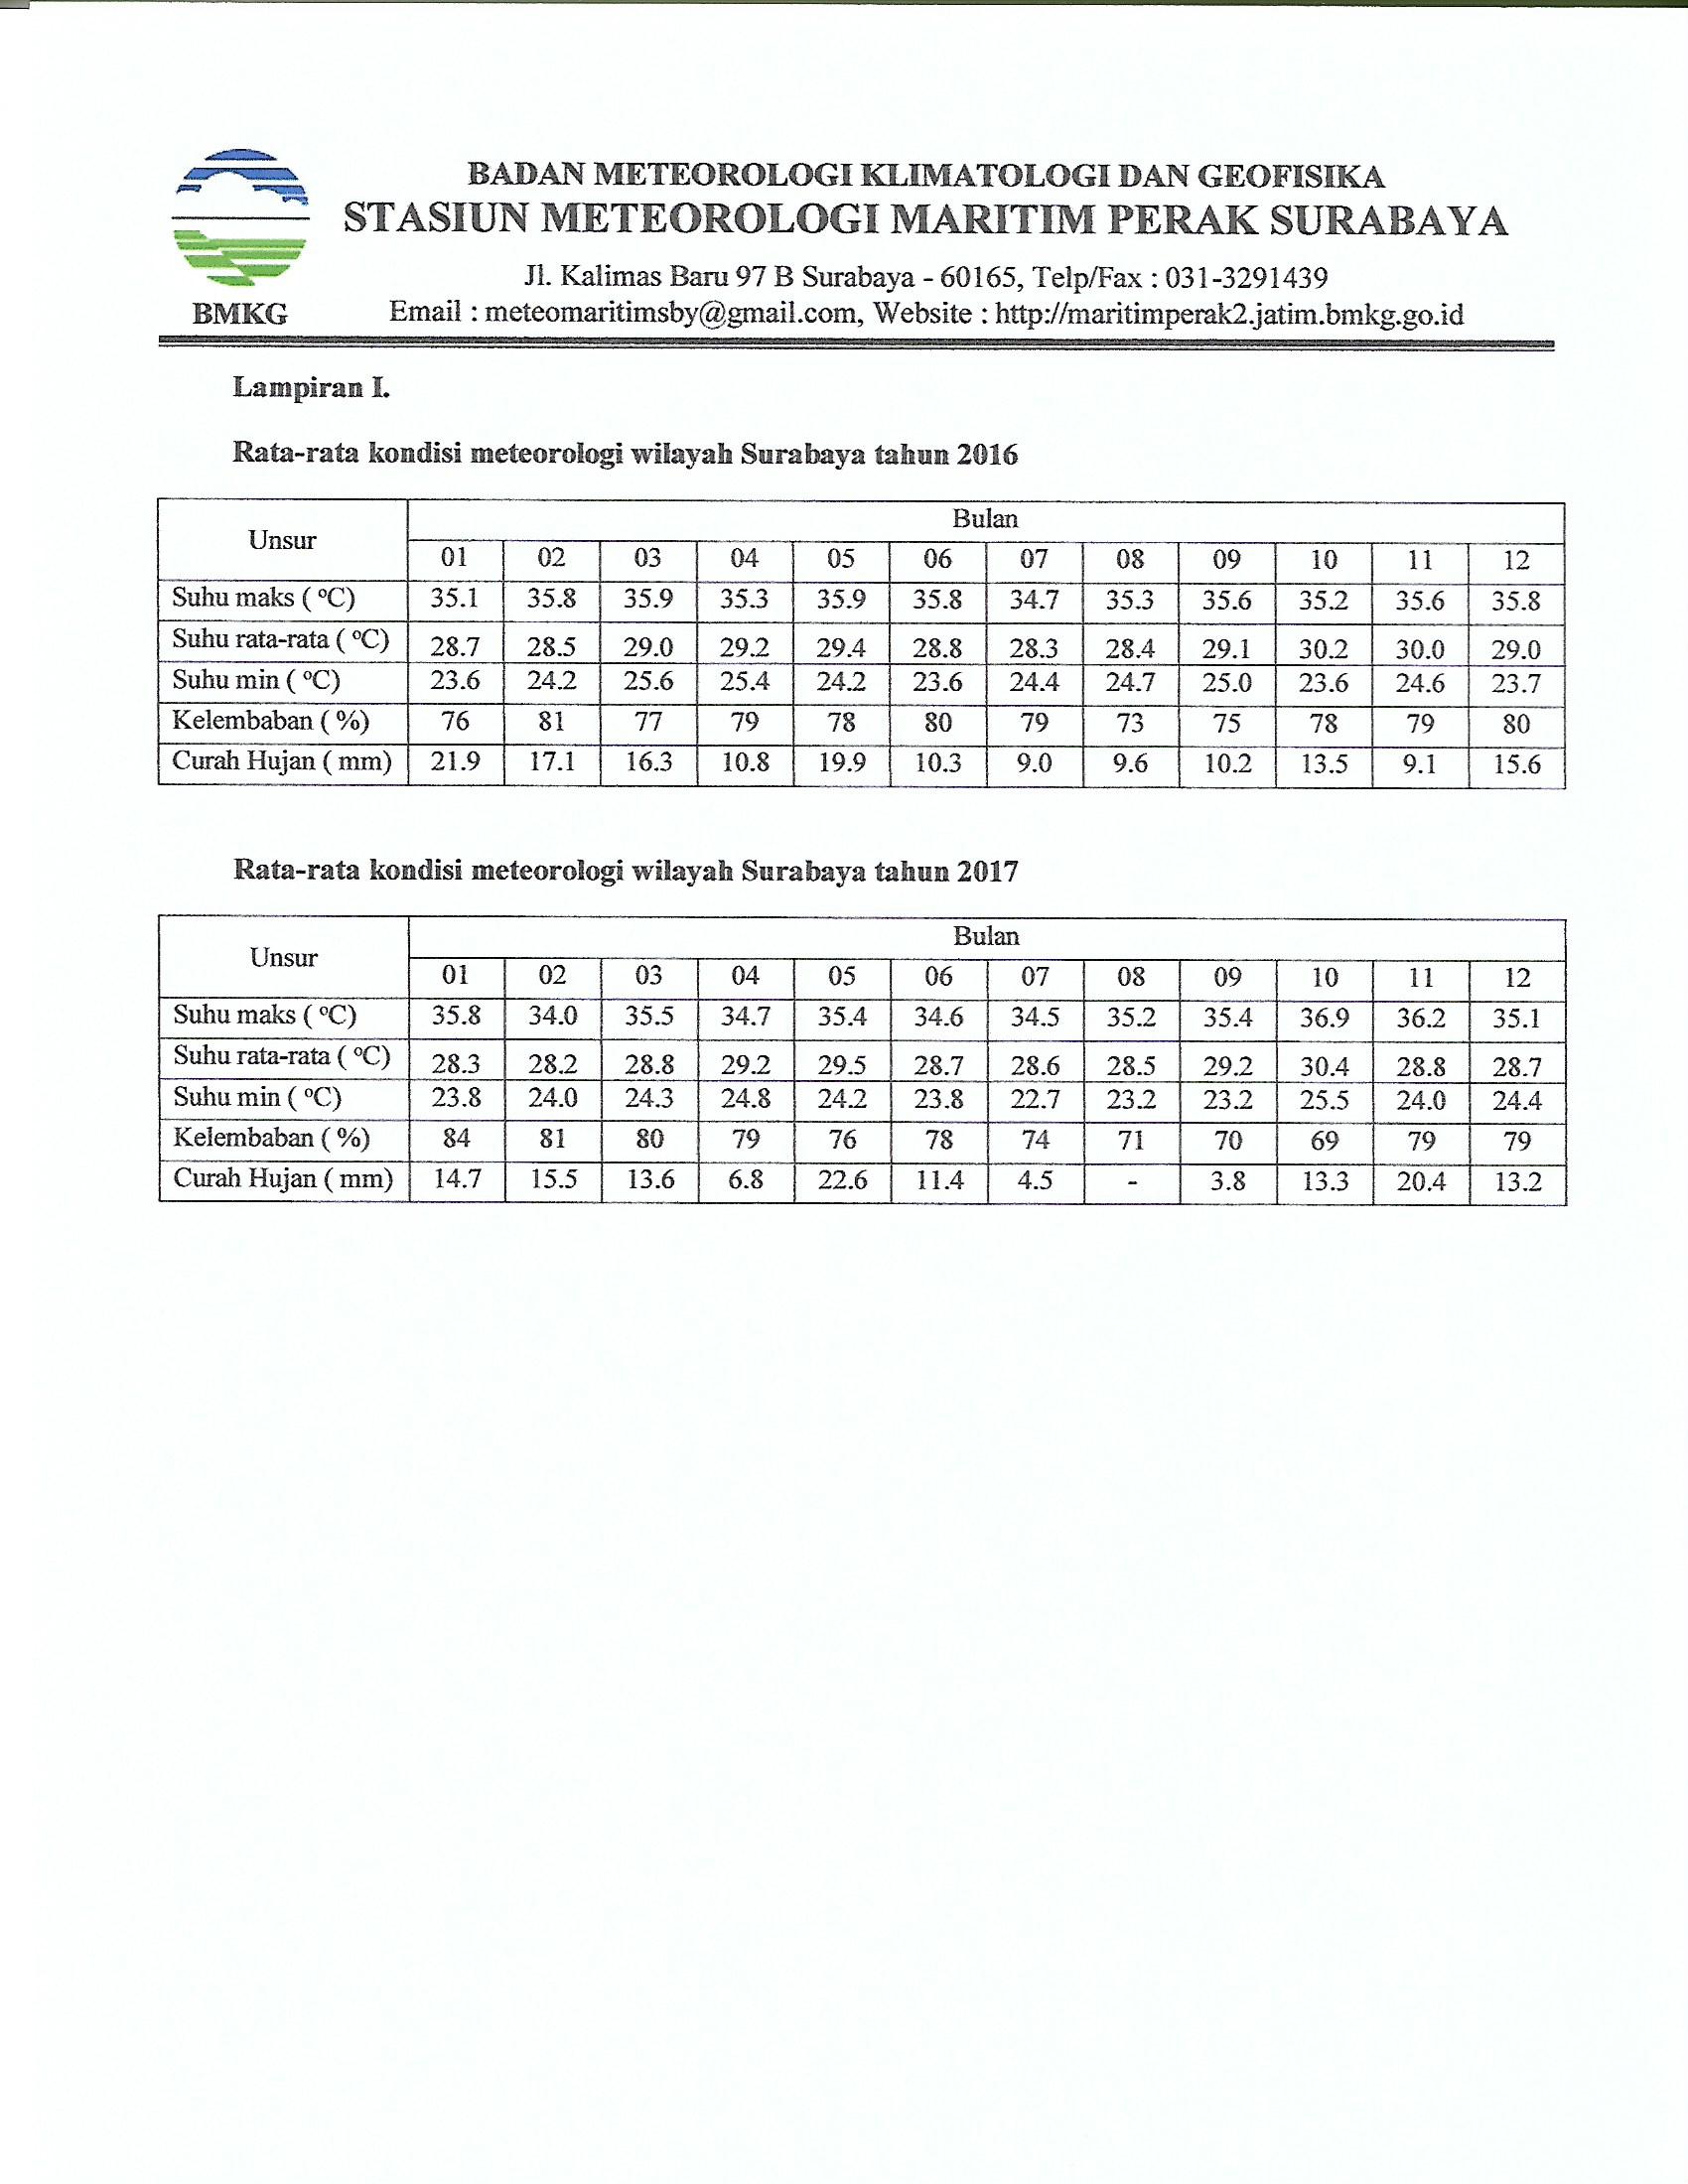


**Attachment 2: Climatic Data (source:** [**www.worldweatheronline.com**](http://www.worldweatheronline.com)**)**

**Climatic Data for Average Temperature, Rainfall & Humidity at Surabaya, East Java, Indonesia from 2009 to 2017**

**
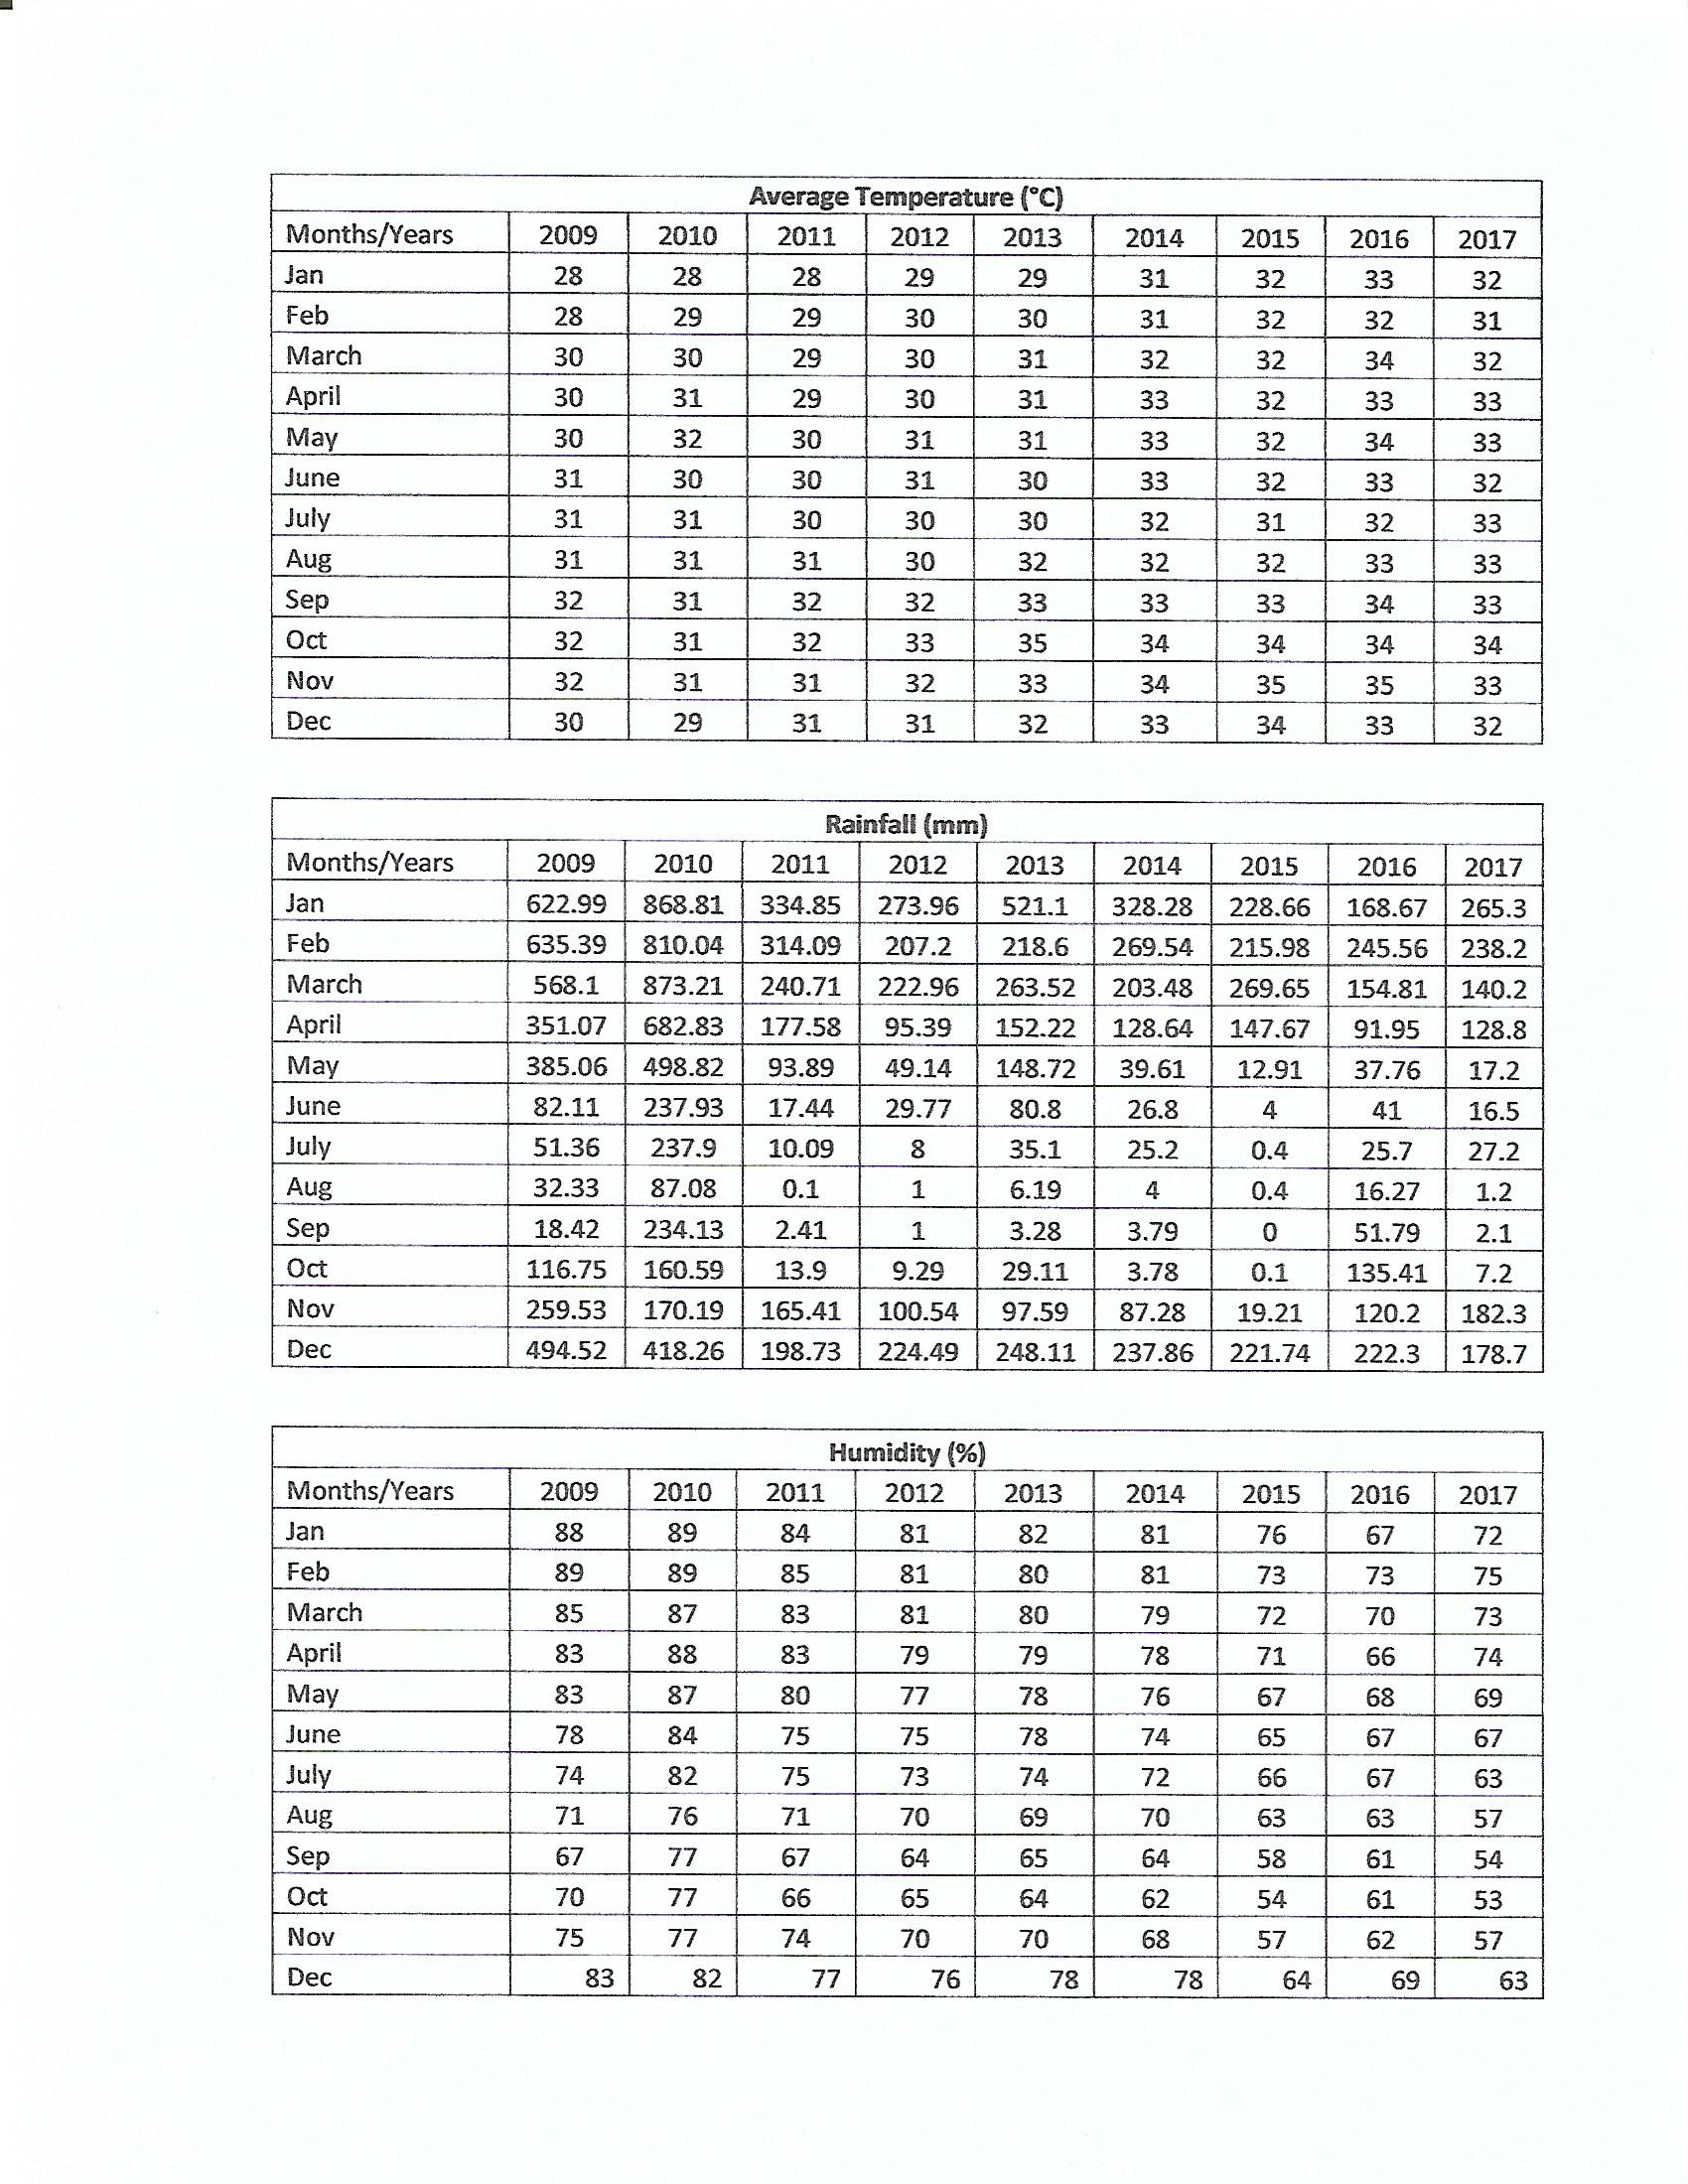
**

**Attachment 3: Dengue Hemorrhagic Fever Incidence Data (source: Surabaya City Health Office)**


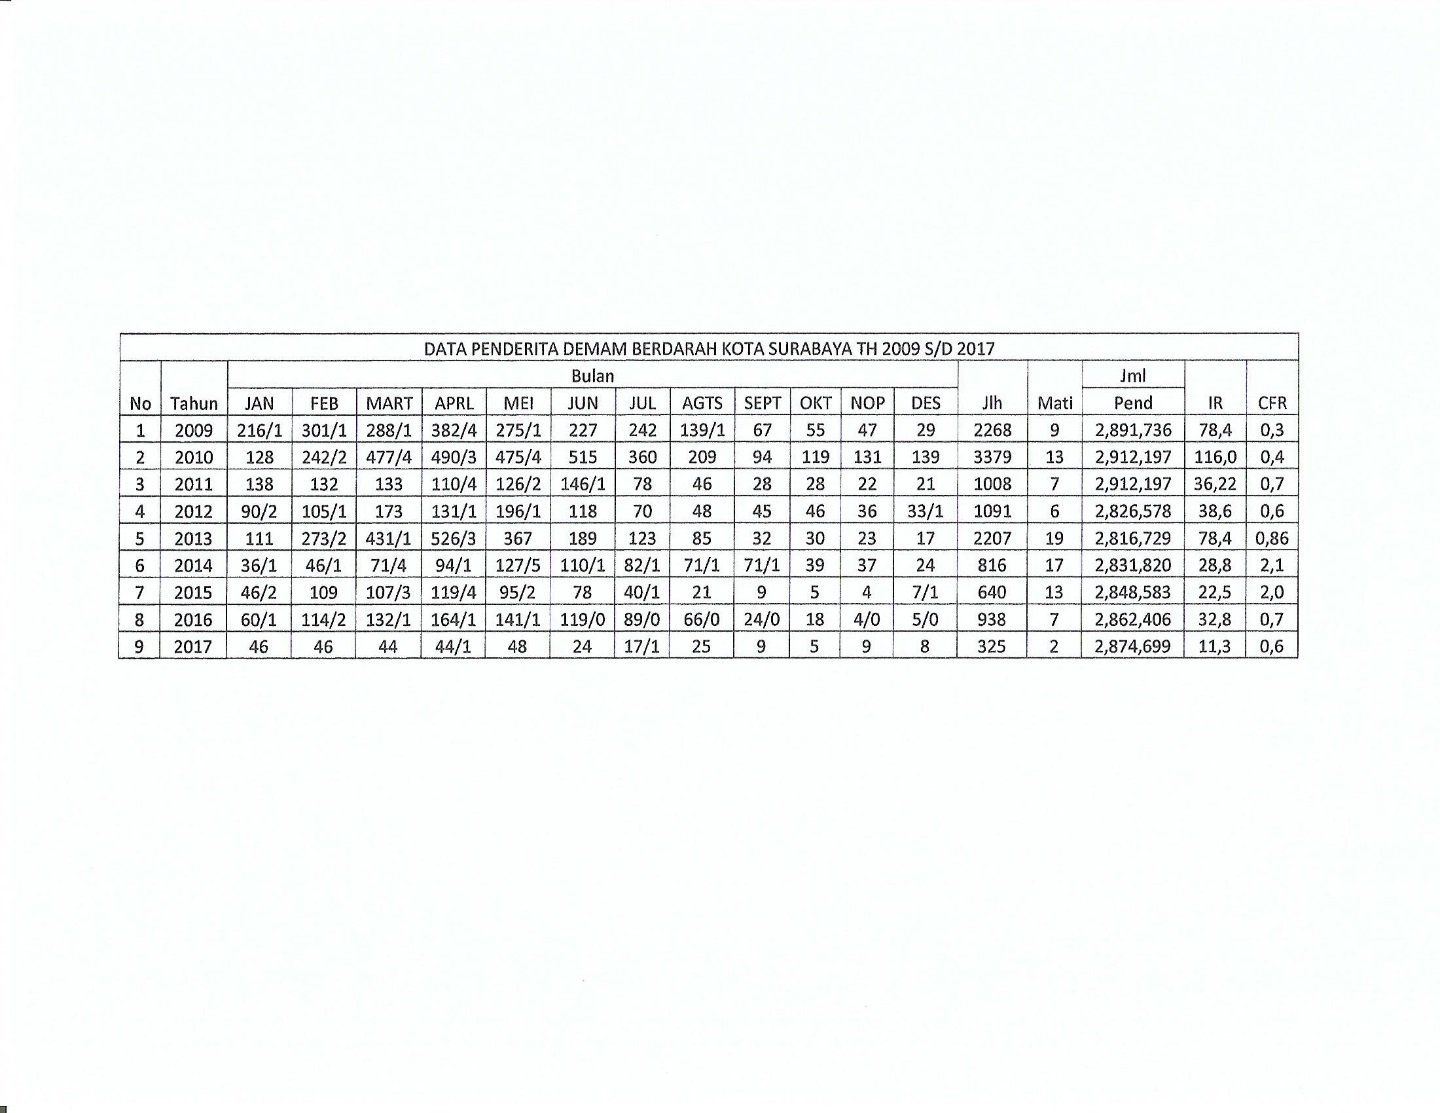


**Attachment 4: Statistical Analysis (SPSS 16.0) – Univariate Analysis**

1. Climatic Variables (Average temperature, rainfall, humidity) and Total DHF cases from 2009-2017


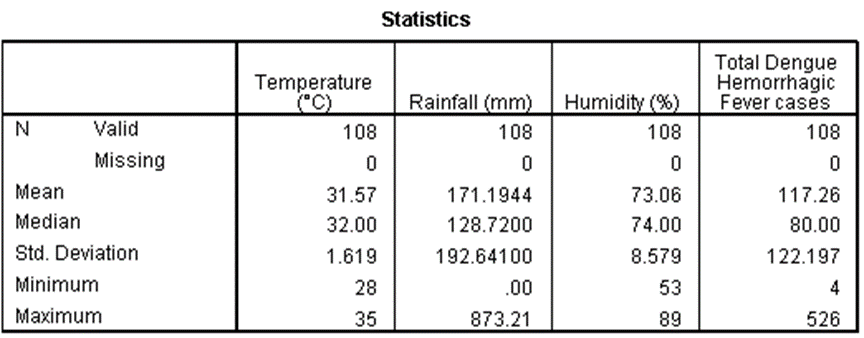


1. Total DHF cases based on months and years

**
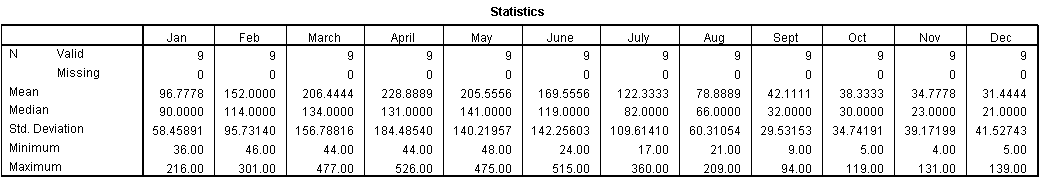
**

**
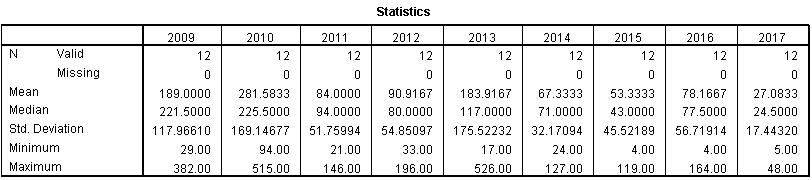
**

1. Average temperature based on months and years


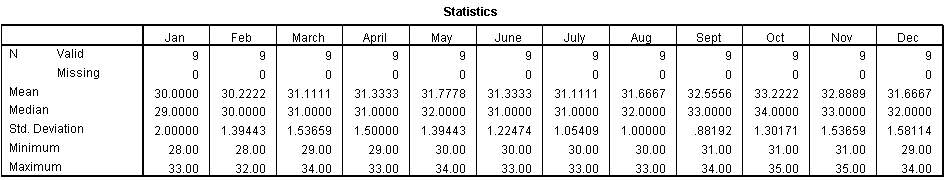


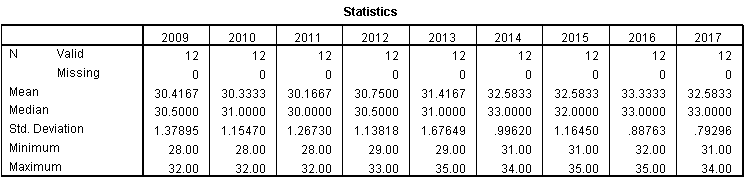


1. Rainfall based on months and years


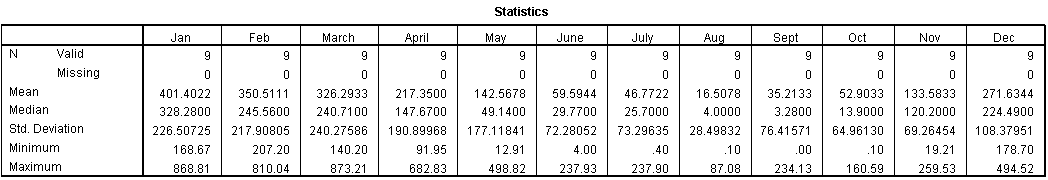


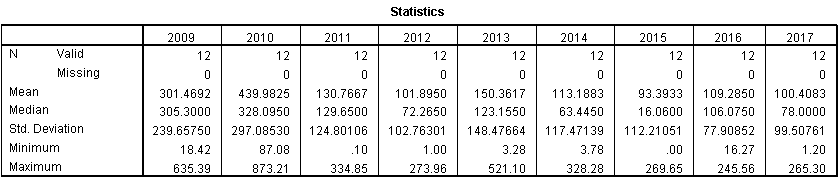


1. Humidity based on months and years


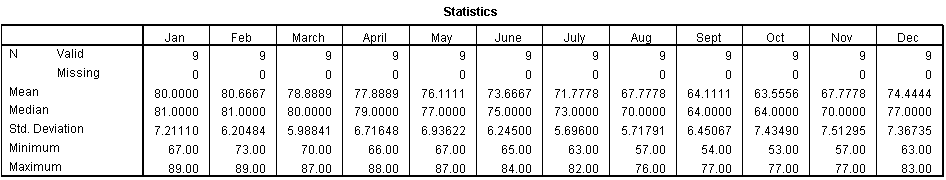


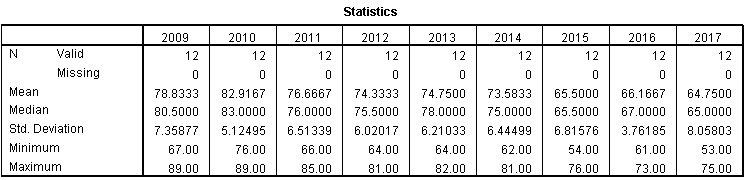


**Attachment 5: Statistical Analysis (SPSS 16.0) - Bivariate Analysis**


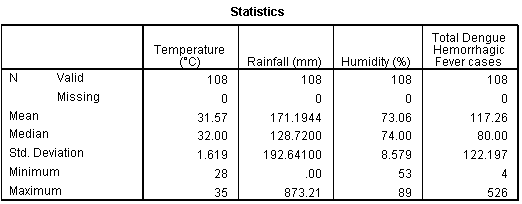


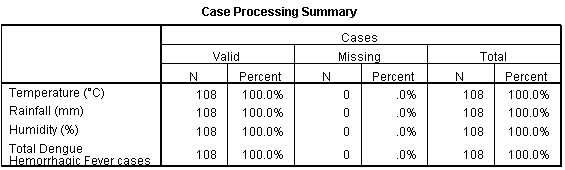


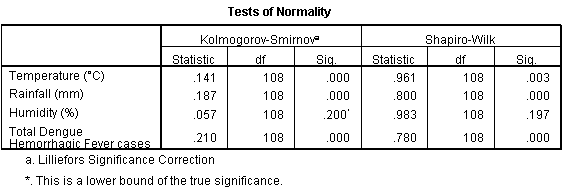


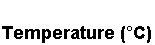


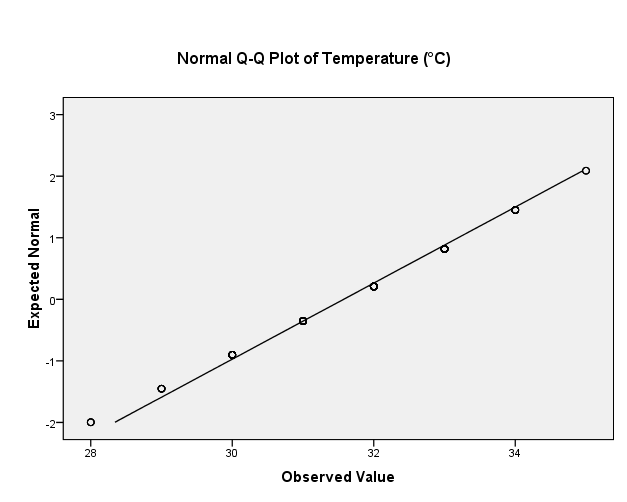


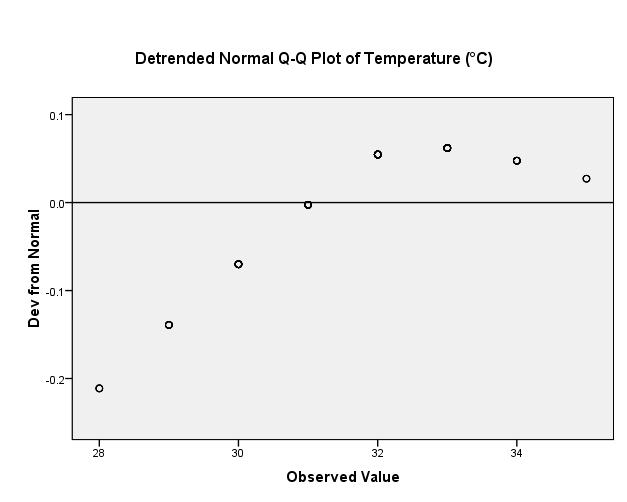


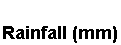


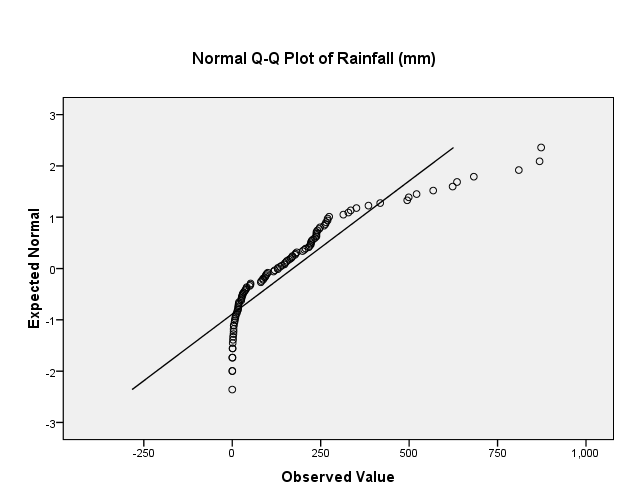


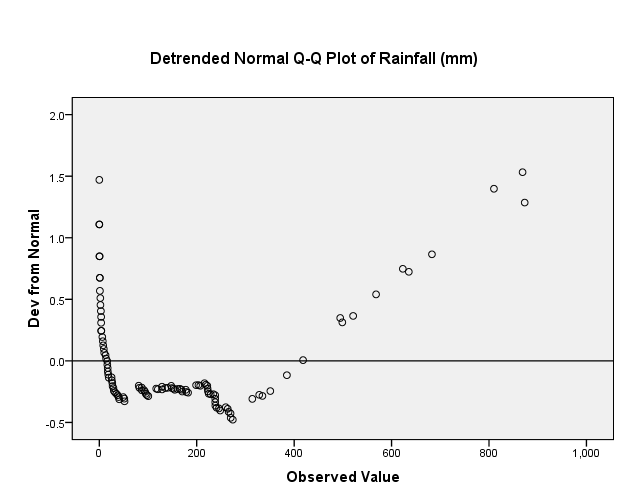


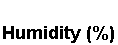


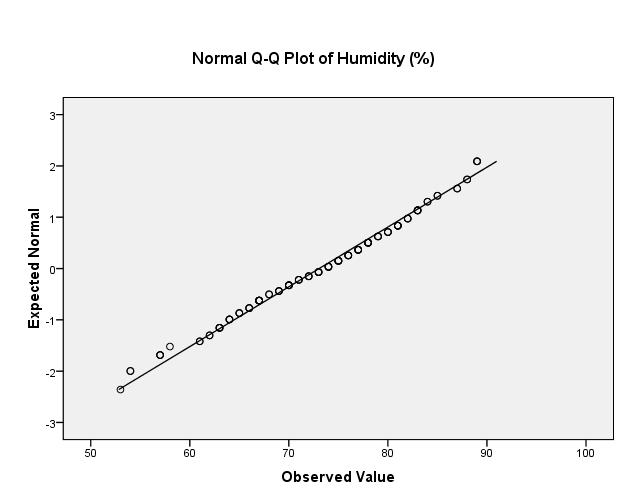


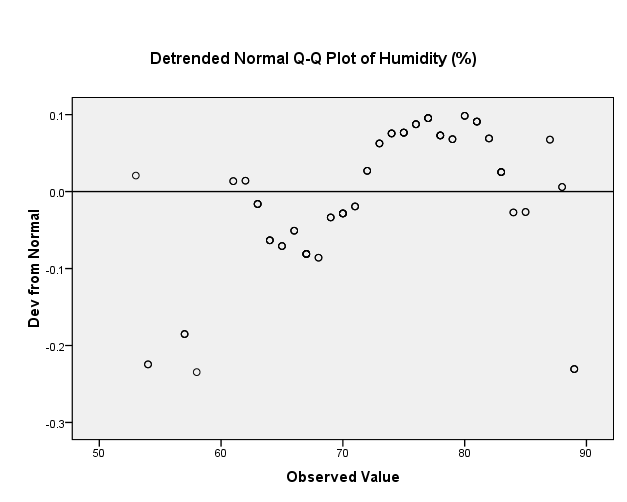


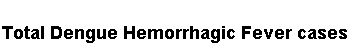


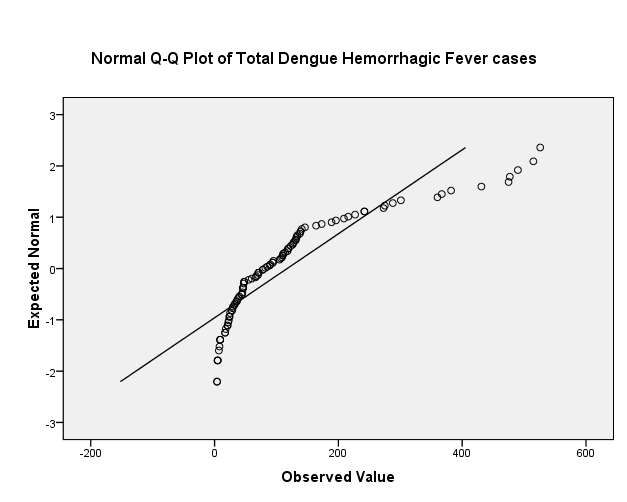

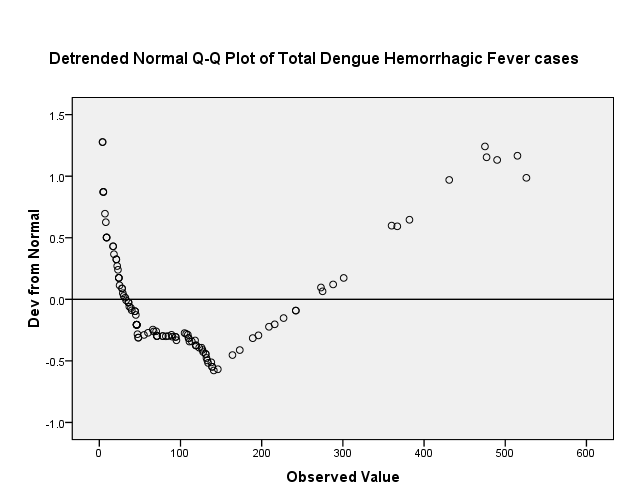


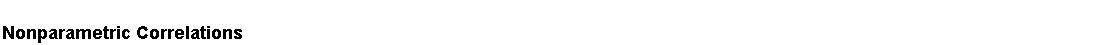


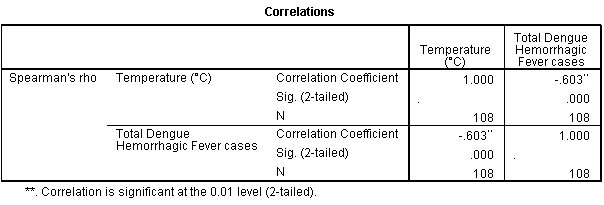


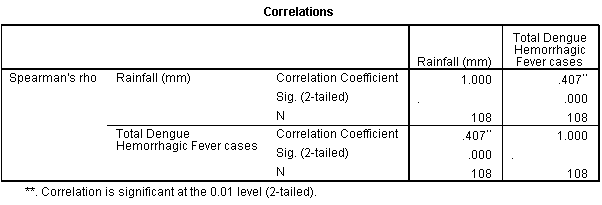


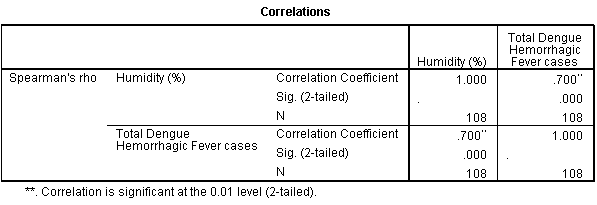

Supplement: Supplementary file 2 [file Supplementary File 2.docx]
