# Supplementary material for: Climate Variability and Dengue Hemorrhagic Fever in Surabaya, East Java, Indonesia
Source: Preprints.org preprint supplement (doi:10.20944/preprints201812.0206.v1), 2018-12-17
Supplement: Supplementary file 1 [file Supplementary File 1.xlsx]

## Sheet: Sheet1
Years	Months	Average Temperature (°C)	Rainfall (mm)	Humidity (%)	Total DHF cases			Case Fatality Rate of DHF cases in Surabaya from 2009 to 2017
2009	Jan	28	622.99	88	216			Year	CFR
	Feb	28	635.39	89	301			2009	0.3
	March	30	568.1	85	288			2010	0.4
	April	30	351.07	83	382			2011	0.7
	May	30	385.06	83	275			2012	0.6
	June	31	82.11	78	227			2013	0.86
	July	31	51.36	74	242			2014	2.1
	Aug	31	32.33	71	139			2015	2
	Sep	32	18.42	67	67			2016	0.7
	Oct	32	116.75	70	55			2017	0.6
	Nov	32	259.53	75	47
	Dec	30	494.52	83	29			Incidence rate of DHF cases in Surabaya from 2009 to 2017
2010	Jan	28	868.81	89	128			Year	IR
	Feb	29	810.04	89	242			2009	78.4
	March	30	873.21	87	477			2010	116
	April	31	682.83	88	490			2011	36.22
	May	32	498.82	87	475			2012	38.6
	June	30	237.93	84	515			2013	78.4
	July	31	237.9	82	360			2014	28.8
	Aug	31	87.08	76	209			2015	22.5
	Sep	31	234.13	77	94			2016	32.8
	Oct	31	160.59	77	119			2017	11.3
	Nov	31	170.19	77	131
	Dec	29	418.26	82	139
2011	Jan	28	334.85	84	138
	Feb	29	314.09	85	132
	March	29	240.71	83	133
	April	29	177.58	83	110
	May	30	93.89	80	126
	June	30	17.44	75	146
	July	30	10.09	75	78
	Aug	31	0.1	71	46
	Sep	32	2.41	67	28
	Oct	32	13.9	66	28
	Nov	31	165.41	74	22
	Dec	31	198.73	77	21
2012	Jan	29	273.96	81	90
	Feb	30	207.2	81	105
	March	30	222.96	81	173
	April	30	95.39	79	131
	May	31	49.14	77	196
	June	31	29.77	75	118
	July	30	8	73	70
	Aug	30	1	70	48
	Sep	32	1	64	45
	Oct	33	9.29	65	46
	Nov	32	100.54	70	36
	Dec	31	224.49	76	33
2013	Jan	29	521.1	82	111
	Feb	30	218.6	80	273
	March	31	263.52	80	431
	April	31	152.22	79	526
	May	31	148.72	78	367
	June	30	80.8	78	189
	July	30	35.1	74	123
	Aug	32	6.19	69	85
	Sep	33	3.28	65	32
	Oct	35	29.11	64	30
	Nov	33	97.59	70	23
	Dec	32	248.11	78	17
2014	Jan	31	328.28	81	36
	Feb	31	269.54	81	46
	March	32	203.48	79	71
	April	33	128.64	78	94
	May	33	39.61	76	127
	June	33	26.8	74	110
	July	32	25.2	72	82
	Aug	32	4	70	71
	Sep	33	3.79	64	71
	Oct	34	3.78	62	39
	Nov	34	87.28	68	37
	Dec	33	237.86	78	24
2015	Jan	32	228.66	76	46
	Feb	32	215.98	73	109
	March	32	269.65	72	107
	April	32	147.67	71	119
	May	32	12.91	67	95
	June	32	4	65	78
	July	31	0.4	66	40
	Aug	32	0.4	63	21
	Sep	33	0	58	9
	Oct	34	0.1	54	5
	Nov	35	19.21	57	4
	Dec	34	221.74	64	7
2016	Jan	33	168.67	67	60
	Feb	32	245.56	73	114
	March	34	154.81	70	134
	April	33	91.95	66	164
	May	34	37.76	68	141
	June	33	41	67	119
	July	32	25.7	67	89
	Aug	33	16.27	63	66
	Sep	34	51.79	61	24
	Oct	34	135.41	61	18
	Nov	35	120.2	62	4
	Dec	33	222.3	69	5
2017	Jan	32	265.3	72	46
	Feb	31	238.2	75	46
	March	32	140.2	73	44
	April	33	128.8	74	44
	May	33	17.2	69	48
	June	32	16.5	67	24
	July	33	27.2	63	17
	Aug	33	1.2	57	25
	Sep	33	2.1	54	9
	Oct	34	7.2	53	5
	Nov	33	182.3	57	9
	Dec	32	178.7	63	8
